# Supplementary material for: Molecular mapping of flowering traits revealed a major QTL, qDFFF3.3.1 associated with early maturity in cucumber (Cucumis sativus L.)
Source: Research Square preprint supplement (doi:10.21203/rs.3.rs-6782233/v1), 2025-06-17
Supplement: Supplementary file 1 [file 57b5e67ee94a7e0612288242.docx]

**Supplementary table 1. List of polymorphic SSR markers used in the experiment with their forward and reverse sequences.**

| Sl.No | Primer name | Linkage group | Forward primer (5'-->3') | Reverse primer (3-->5') |
| --- | --- | --- | --- | --- |
|  | MU9389-1 | Ch -1 | AATGGCGGCTTCAACTTAGA | CTGAATCAGCCAACGAGTCA |
|  | SSR04992 | Ch -1 | TTGACCCATAGACCCACACA | AACAACCAACAGGCCAAGAG |
|  | SSR04278 | Ch -1 | GAGGGAAGAAAATTGAAAGCAA | CCGATAGTGTCAGCCCACTT |
|  | MU4553-1 | Ch -1 | GGGCTTGAAGAAAATCCCTC | GATGTGGAAGAGGCAAAAGC |
|  | UW074015 | Ch -1 | GCCGCATGGATTCTCAATTA | CCCAGACTCCCTTGTGATGT |
|  | UW083977 | Ch -1 | GGATAGATACCCCAACCCATC | ACATACATCCTTGACCTTAGAGGTTT |
|  | UW000100 | Ch -1 | CAAAATTTGTAGCCGGTTGG | GTGGTTGCATTGGCTCAAGT |
|  | SSR05817 | Ch -1 | CAAAGGCAGAAGCAAAAACA | GAGGGAGATGAGGTTTAGACGA |
|  | SSR15108 | Ch -1 | CCGAAGATTTTAATGGGAGGA | CAGCCGAGACAATCAAACAA |
|  | UW044613 | Ch -1 | GGCATTCGCATCTTTTATCC | CCAGAATCATTCACATGGCA |
|  | UW023709 | Ch -1 | TTTTGTTTGAATTGGGGTTTTT | TCCTGACGACACCCTTCTTC |
|  | SSR00160 | Ch -1 | TGAATGAAAAACGTGATGTTGA | TTGGAAAAGCCTCTCATTCG |
|  | UW073891 | Ch -1 | CATGGCATGGTATGGTTTGA | ATCGTTAAACGTTTCTGCCG |
|  | SSR14445 | Ch -1 | TCCATGGAAATTGAAAACCC | CGATCCTTATCGAACAGCCT |
|  | SSR23487 | Ch -1 | TGTTTCAAGGTGCTGACCTG | CCACAACAACAAAAGAATGTGAA |
|  | SSR23757 | Ch -1 | TTCGCCTTTACTTCCTTCCA | CGGCAAAATTCCTCCATTTA |
|  | UW083728 | Ch -1 | TTCGCCTTTACTTCCTTCCA | CGGCAAAATTCCTCCATTTA |
|  | SSR14991 | Ch -1 | CCGCATTAAGCTGGAAACAT | CAAGCATACGTCAACATTGGA |
|  | SSR16869 | Ch -1 | GAAAACATGAAGGCCGTTGT | CCATTTGTCAGTGCCTTTCA |
|  | SSR12959 | Ch -1 | TTCGCCTTTACTTCCTTCCA | CGGCAAAATTCCTCCATTTA |
|  | CM16 | Ch -2 | TGCCTGTTGTGATTGAGGAG | TTCTTCTTACCTCCGCCAAA |
|  | F5-69 | Ch -2 | CACCTGACGATAGGGGTGTT | AGTATTCGGGTTGGCAAAAA |
|  | UW083939 | Ch -2 | AATTCCCAAAATTTGACTCCA | GAAGATGAAGCGCGTGAGTT |
|  | SSR03488 | Ch -2 | AACTATCTTTTGGCCCACCA | TTCAGTGGAATGAATGATTATGCT |
|  | SSR00684 | Ch -2 | AAGGCCAAAAGACTATGCGA | CATCCCTTGCATCTCCACTT |
|  | UW085153 | Ch -2 | TTTATATTTAGGGAAACACACACG | CAAAAATCATGTGTAACTAAGCAAA |
|  | MU16480-3 | Ch -2 | CCCTTCATATCCCCAAACAA | AATGACGCTGCCATCCATAC |
|  | SSR02539 | Ch -2 | AAAAATGATCAGCTCGATGAAA | GCAAGCGCTTTCCAATCTAT |
|  | SSR12810 | Ch -2 | TTCCCACAAAACAAATCTTGG | TTTTGGAGAGAAAAGGTTGGA |
|  | CM46 | Ch -2 | GCTCCGGCAAACCTTTTTAT | GTGGACACGGTGATCACAAA |
|  | SSR22653 | Ch -2 | TGAATTTCTTTGGTGGATTCAA | ACCTCCCATGGCAATCTACA |
|  | UW036913 | Ch -2 | TTTTGAAAATGGCTGCTGTG | GGCACGATGCCTTTAACTGT |
|  | MU12359-1 | Ch -2 | CTCCCTTCACTCCAAATCCA | GAGAGCCTTGAAGCTGAGGA |
|  | UW084187 | Ch -2 | CACCGTGTTTGAGTTATGTAGG | TGTCTGCGGTCAGCTAAGAA |
|  | UW084789 | Ch -2 | TTTTGAATGGAAGGCACAGA | AATAAACAATAAAATAGTGGAGCAAAT |
|  | UW084848 | Ch -2 | TTTAAGCGCAACTCAACTCG | GAAGGCTACTACCGTCTTTGTATAG |
|  | UW083916 | Ch -2 | AGGGATTGGAAGTGAACAGC | ATACCGTCCATTTGGTCGAA |
|  | SSR20248 | Ch -2 | TCCTCAAACGTCTCTCTCCC | GATAGCATGCGGTGTCCTCT |
|  | SSR18157 | Ch -2 | TCCTCAAACGTCTCTCTCCC | GATAGCATGCGGTGTCCTCT |
|  | SSR13275 | Ch -2 | CACCTTGTTTCGCACGAGTA | GGAAAGGGACCACAAATTCA |
|  | SSR15873 | Ch -2 | GCCAAAAATCCGAGAACAGA | TCCTGGGATTTTGATTTGCT |
|  | SSR16916 | Ch -2 | AGCATGATGAGGATCCCTTG | CCGAACTGCACAAAGTATGG |
|  | SSR01573 | Ch -3 | CCAAAACCACAACACACTCG | TCTCTAAGCTCCGTTTCACCA |
|  | UW085395 | Ch -3 | AAAACCCCTTCCCATTTCC | AAAAACAACTTTCACCCTCCA |
|  | UW085093 | Ch -3 | AAATCAAAAGGCCAACATCC | GGGAATTAAAGTGAGGAAAAGC |
|  | SSR20338 | Ch -3 | TGATGATCCCACACGTCAAG | TGGTGAAAGGTGGTGTGAGA |
|  | UW084840 | Ch -3 | ACACGTAGTCAGAAAAACATATAAA | TTAAACAAACCCAAATCTTTTCTTC |
|  | SSR30236 | Ch -3 | TCAATTAAACGAGTGGCAAAGA | GCCACGGGTTGACTACAAAT |
|  | SSR21055 | Ch -3 | CATCCTCATCCACCCAATCT | TCCAAACAAGTCTGACAAGGAA |
|  | UW085055 | Ch -3 | CCATTGTCTCTTCCTTCGAAAA | CATCTGTTGTGGAGGCATTG |
|  | SSR16301 | Ch -3 | TTCTCCCTAAAAAGAACCCAA | TTCATGGTGGGAGAGATTGA |
|  | SSR17583 | Ch -3 | GTTGATAAAAGAAGCCGCCA | TCTAAGCCGCCCTTAAAACA |
|  | SSR15419 | Ch -3 | ATGGCAAAGCCAAAAAGATG | TGTTGCAAATATTGCACCTTC |
|  | SSR19430 | Ch -3 | TATGGCGAAGAAGCTTTGCT | AGGGGGATCTTGCCTCTAAA |
|  | TJ32 | Ch -3 | GGAAGCTTCATTTGGGTCTATG | GGAGGAGGATGAAGATGAAGC |
|  | SSR15029 | Ch -3 | CCTGCTTCCCGTTCAAATTA | TTGTTTCTCAGTCAAATAGCTTCG |
|  | SSR03918 | Ch -3 | TGAGGGTGAGACAACAAATCA | TGTGTTTGACAAAGGAAAGGAA |
|  | SSR04922 | Ch -3 | TCCCCATGATTTGAAGCTCT | TGAAGACATTGGGAAGTGGTT |
|  | SSR13274 | Ch -3 | TCCACTCAAACTTTCTCCCC | CAACATTGGATGAGCTTTGC |
|  | NR85 | Ch -3 | TGATGTGTCTGGCAAGAACC | GGTAAGAAACTTGGCAGTTGC |
|  | UW083876 | Ch -4 | TCGACTTTATCGGGAAGTGC | GTGGTTGCTCCACCAGTCTC |
|  | SSR05899 | Ch -4 | TAAGAGCAAAAATCCCACGC | AGCTCAATCAACGTCAAGAGAA |
|  | UW058682 | Ch -4 | AACTTCTTTTCTGGGAACAACG | ATATTCCTCGTCTGGAGGCA |
|  | SSR06253 | Ch -4 | TGTGGGTACTCCTCAAACCA | TGATATCCATATCTTTGAAATGTCTTT |
|  | UW084529 | Ch -4 | TCCTCACAACTAAATACACATAACAA | CTGATTAATGAATATGAAGTTGACACA |
|  | SSR07581 | Ch -4 | TTGAGAAGTGCTTCCCTACACA | ATTGATTGCCACCACTCACA |
|  | SSR14617 | Ch -4 | CAACTCCGGTTCAAAAGTTCA | TGTCTTCAATGCCCTTTCAG |
|  | CMTCN56 | Ch -4 | ATCCAAAAGGAATCGGAAAG | CTTTTCTCTTCTTCTATTCTC |
|  | SSR05125 | Ch -4 | TGGCTCCTTCACATTGTTGT | TGGGAAAAAGGGTATGGAAA |
|  | UW085160 | Ch -4 | TTGTGTACCCTCCCTTGTGG | GGTTACATGTATAACCGTTAGATTCAA |
|  | SSR21563 | Ch -4 | GCAAGGAGTGAACAAACGGT | GTTCTCCACCATAACCCCCT |
|  | UW083894 | Ch -4 | AAGATTGTTTTGTAGCTCGCAGA | ACAGACACACGAGCGATGAG |
|  | UW042029 | Ch -4 | CGTTGTCAAAATCTACAAATACCAA | AACACCCACCACCAGTGAAT |
|  | TJ227 | Ch -4 | CCCTCGAGAAACCAGCAGTA | CACCTCCGTTTTTCATCACC |
|  | UW084662 | Ch -4 | CACGGCTCTTATCGGTTAGT | CACTAGGTCGTTCAAAGCAA |
|  | UW084716 | Ch -4 | GATCCATTCCCCTTTCTTCA | GAAAAGCATAGGACACGTCG |
|  | CSWACC2 | Ch -4 | TTGGCGTTGGAACTCCTGATGTTT | CCTCCTCAAGACTTGAGAGACGAT |
|  | SSR16038 | Ch -4 | TGGCAAAATATCACATTCTTGAT | TTGTTGTCATCTAATGCAATTTTTC |
|  | SSR13456 | Ch -4 | ATGTGGGTGTGGAAAAATGG | TAAAGGGGCAATTTGGTGAA |
|  | UW085227 | Ch -5 | AAATGGGTCATACCCAAAAGG | GCCAATGCAATTACTTCAGG |
|  | UW085400 | Ch -5 | TCATTTTTGGGTTTAGATTTTCA | CTTTGACCTCGGGTTGTGAG |
|  | UW084535 | Ch -5 | CCTTACCTTATTGCTTCCCACA | TCCAATTGGTTAGAGTTTTCAAGA |
|  | UW085322 | Ch -5 | TGGACTGAACCCTTTGGTTG | TCGGAATTGTGTCATCTCC |
|  | UW079110 | Ch -5 | GTTTTTGCATCTCCCACGAT | TTCCTTTCCATGGTCTTTCC |
|  | SSR16110 | Ch -5 | GGAATATGGAAGGAAAGCCA | ATCCCCAATTCCTCCAAAAC |
|  | UW084496 | Ch -5 | CGAAGAAGATGAAACCAGCA | TCATCACACACATTATATATACCACCT |
|  | SSR01691 | Ch -5 | TGAGACTCAAACATTGTGGACTT | AAACGTGCAGCTAAACCAAT |
|  | UW085134 | Ch -5 | GAGAAGAATATAAACGAATGACATCAA | TTTTCTTTCCCTTTTGACCTT |
|  | SSR18792 | Ch -5 | CTAAGTCTCGCCTCTTGCGT | GTTGTTGGATGGCCTAGCAT |
|  | SSR19178 | Ch -5 | CCGTTCCTAGAATAGCGTGT | CCCACGCCTTCTATTCTACA |
|  | UW084351 | Ch -5 | GAAACACAAAGTTAAAACAAAAATCC | GACATCACGACGTGGAACC |
|  | UW083747 | Ch -5 | GAACGAGAGAGACTTGTTTTATTTCTT | ATGTGCATGTGTGGTTGAGG |
|  | SSR16068 | Ch -5 | TATAACCCCGTCTTCTCCCC | GGGAAACCCCTTTGACTCTC |
|  | UW083941 | Ch -6 | CAATGGAAGATTCTCAAATTGTTG | TTGAGAGGCACTTGATGTTCA |
|  | SSR14061 | Ch -6 | CCCAAGTTCTTGTGTTCTATGC | TGCACGTGATTTGGTTTTGT |
|  | UW085004 | Ch -6 | GGCCACTAAGCTCAATACAC | CATTTCCTCCTTCCTTCTTT |
|  | UW085008 | Ch -6 | GCGAAGGAGTTTTTAGCATA | TGTTAGGAATTAGCCCACAC |
|  | UW083813 | Ch -6 | GCAACCGATTAATCACAAGT | GACAAGAAGGTAGCTTTCCA |
|  | UW084122 | Ch -6 | TCGCAAACTAACACCCTTAT | TTTTAACTCCAACGCATCTT |
|  | UW084267 | Ch -6 | TCATTTTTGTTCTCACACCA | CTCTCCATCTCCCAATAACA |
|  | SSR11741 | Ch -7 | GTCCCCTCCATTGACAAAGA | GAGCCCCTGTACGATGTGAT |
|  | NR56 | Ch -7 | CTTTTCTCTTCTTCTATTCTC | ATCCAAAAGGAATCGGAAAG |
|  | MU4104-1 | Ch -7 | TTTCCCGCATTGATTTTCTC | GAGAAACGCTTCCCACAAAC |
|  | UW085402 | Ch -7 | CGGCGCCACTCAGTTAGAT | AAAACCATTAAATTGGAATGATAAA |
|  | SSR13188 | Ch -7 | GGGAATTTTCATTTATTTGGTCA | GGGAATTGGGATCCCTACAA |
|  | SSR13787 | Ch -7 | GGTCGGTCGACTCGATATTC | CATTTGGTCACATATCCTCTTCC |
